# Supplementary material
Source: PubMed Central journal article supplement (PMC11034744)
Supplement: NIHMS1978654-supplement-Supplemental_Materials_2.pdf [file NIHMS1978654-supplement-Supplemental_Materials_2.pdf]

## **Hospital Leaders, Physicians and Researchers: Interview & Focus Group Questions**

1. Can you tell me a bit about yourself, your role and (if relevant) the type of research that you conduct?
2. We are interested in how patients, family members, caregivers and researchers engage in research. By engagement we mean meaningful involvement of patients, family members and caregivers throughout the research process – this includes from topic selection, through design of a study, through implementation, to sharing of results or findings with the public. Why do you think it is important to engage patients, family members or caregivers as team members of research projects that are seeking to improve care delivery and the patient experience in the hospital?
3. [THIS QUESTION FOR HOSPITAL MEDICINE PHYSICIANS/RESEARCHERS ONLY]. Hospital Medicine physicians care for a broad range of patients. Are there specific groups of patients that you feel should be represented in research engagement efforts?
4. Can you share with me your experiences of recruiting hard-to-reach and under-represented groups to ensure that their opinions and perspectives are included in your PFACs?
4. What types of information, support or tools do researchers need to fully engage with patients and family members in research?
5. What are the barriers or challenges for researchers to engaging patients and family members in research?
6. Finally, tell me are there things we haven't discussed yet that I should be aware of as we are planning a series of trainings for researchers, patients and families, to make their partnership in Hospital Medicine research most productive?
